# Supplementary material
Source: PubMed Central journal article supplement (PMC8603236)
Supplement: jamaophthalmol-e214852-s001.pdf [file jamaophthalmol-e214852-s001.pdf]

## Supplemental Online Content

Lavista Ferres JM, Meirick T, Lomazow W, Lee CS, Lee AY, Lee MD. Association of public health measures during the COVID-19 pandemic with the incidence of infectious conjunctivitis. *JAMA Ophthalmol*. Published online November 18, 2021.  
doi:10.1001/jamaophthalmol.2021.4852

**eFigure 1.** Directed acyclic graph

**eFigure 2.** Effects of public health measures in Australia

This supplemental material has been provided by the authors to give readers additional information about their work.

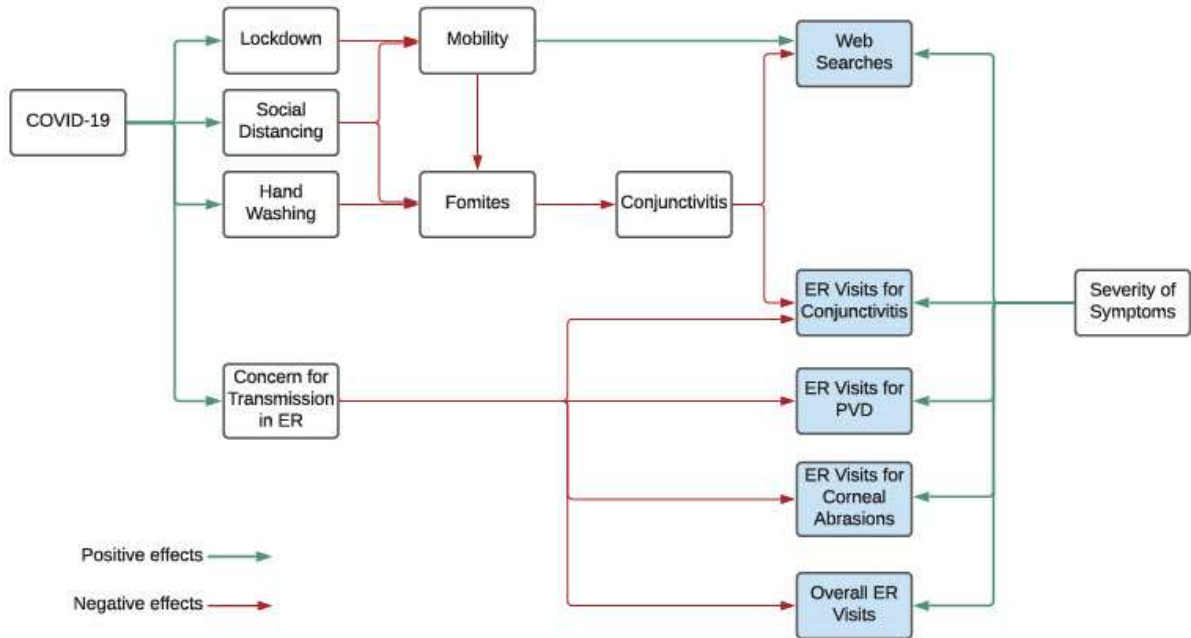

**Supplemental Figure 1. Directed acyclic graph.** We hypothesize that increases in hand hygiene, social distancing, and lockdowns led to a decrease in transmission of conjunctivitis. Concern for transmission of COVID-19 within the ED likely led to decreases in overall ED visits.

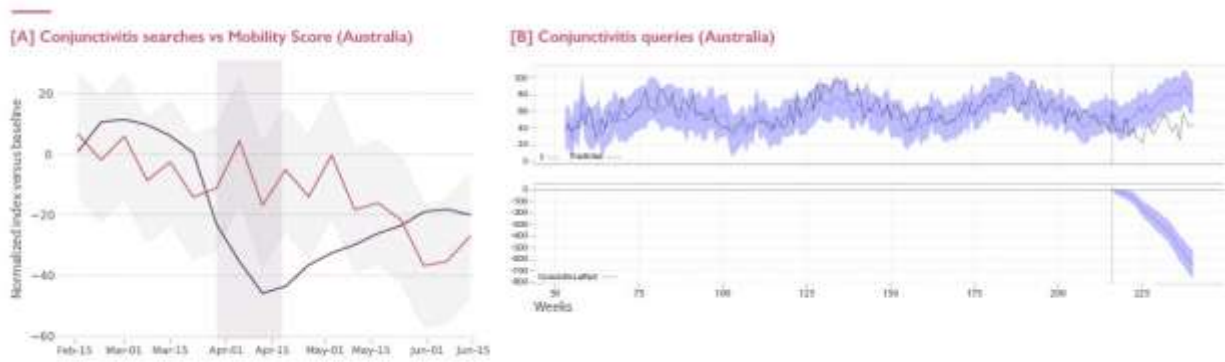

**Supplemental Figure 2. Effects of public health measures in Australia.** Australian smartphone mobility index (blue line) from February 15, 2020 to June 15, 2020 is plotted with the change in search interest in conjunctivitis-related terms (red line) in Australia (A). The shaded area corresponds to the beginning of the COVID-19 pandemic (March 2020). The seasonal trend of search queries related to conjunctivitis in Australia (B), predicted (dotted line, shaded area 95% CI) and actual (solid line). The bottom panel shows the cumulative effect with 95% confidence intervals over time after the start of the pandemic.
